# Supplementary material for: A novel Y-shaped photoiniferter used for the construction of polydimethylsiloxane surfaces with antibacterial and antifouling properties
Source: Royal Society of Chemistry journal article supplement (doi:10.1039/d1tb01968f), 2021-11-24
Supplement: d1tb01968f1.pdf [file d1tb01968f1.pdf]

**Electronic supplementary information for:**  
**A novel Y-shaped photoiniferter used for the construction of**  
**polydimethylsiloxane surfaces with antibacterial and**  
**antifouling properties**

Wei Sun, Jingrui Liu, Qing Hao, Kunyan Lu, Zhaoqiang Wu\* and Hong Chen

College of Chemistry, Chemical Engineering and Materials Science, Soochow University, Suzhou  
215123, P. R. China

E-mail: wzqwhu@suda.edu.cn (Z. Wu)

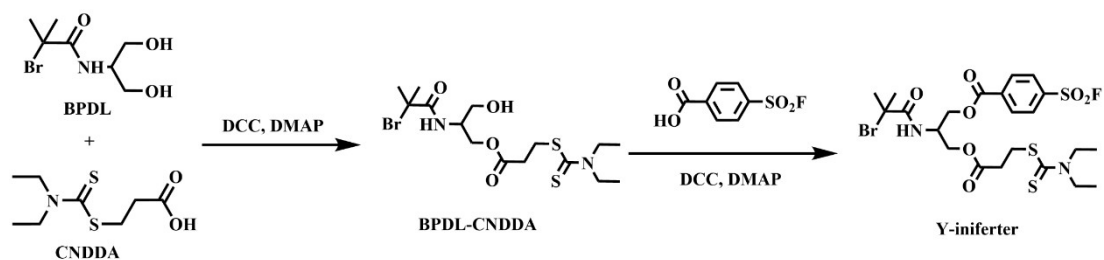

**Scheme S1.** Synthetic route of Y-iniferter.

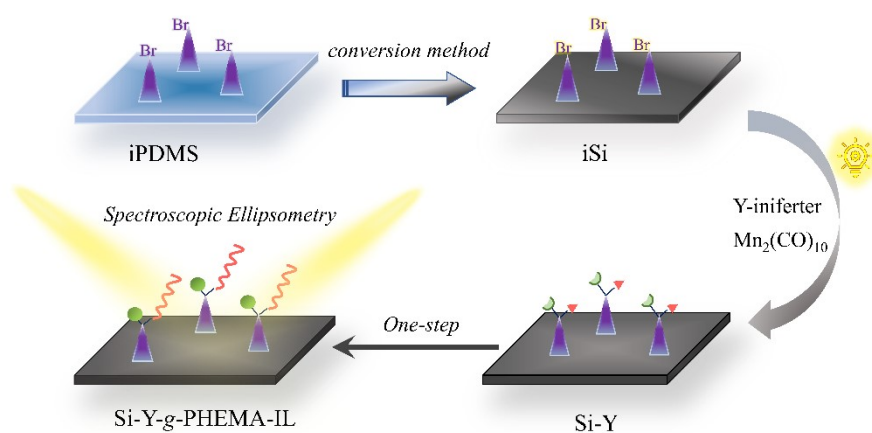

**Scheme S2.** A conversion method was used to substitute iPDMS with Si wafers (iSi) that also possessed *tert*-butyl bromide initiation sites on the surface. Then Si-Y with Y-iniferter immobilized on the surface and Si-Y-g-PHEMA-IL with polymer brushes grafted on the surface were prepared by successively using the same strategy as iPDMS-Y; the thickness of the grafted layers was measured by ellipsometry.

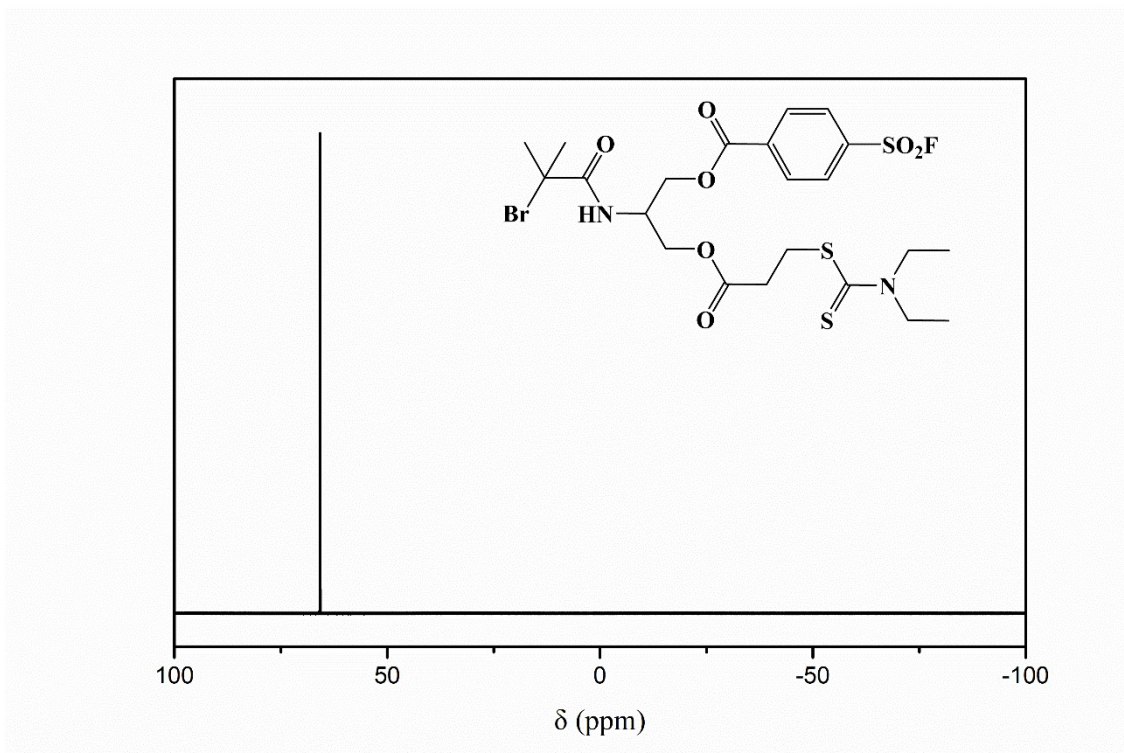

**Figure S1.**  $^{19}\text{F}$  NMR spectrum of Y-iniferter in  $\text{CDCl}_3$ .

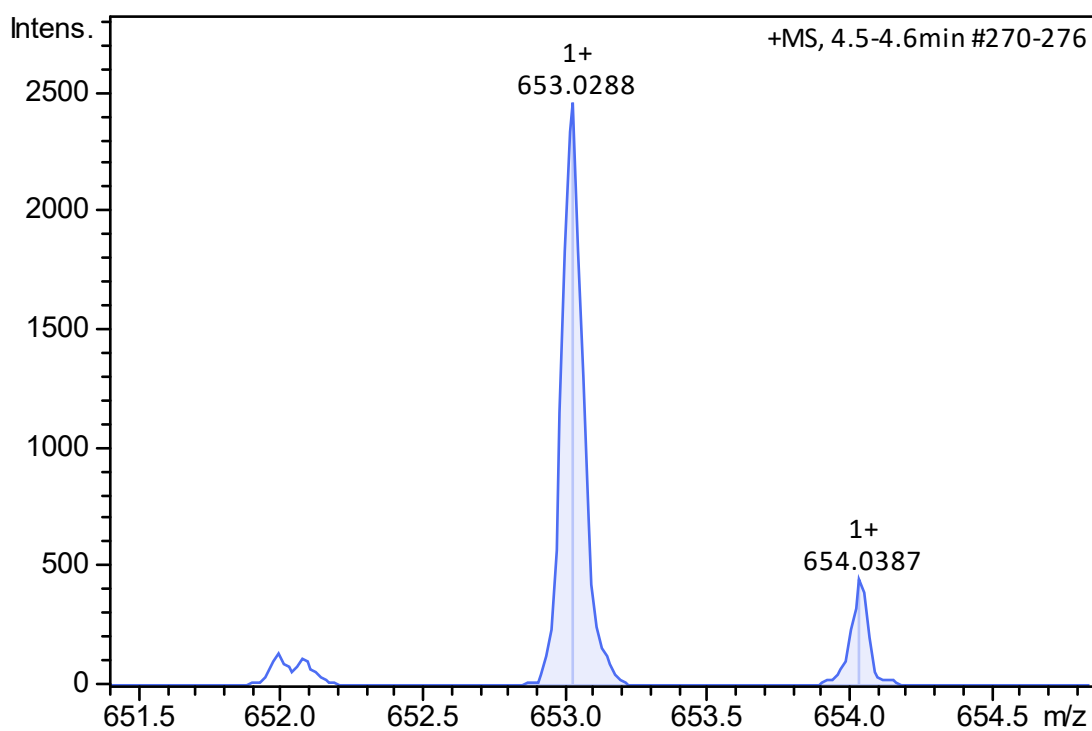

**Figure S2.** MS spectrum of Y-iniferter in methanol (calculated for  $\text{M} + \text{Na}^+$ :  $m/z=653.0255$ ).

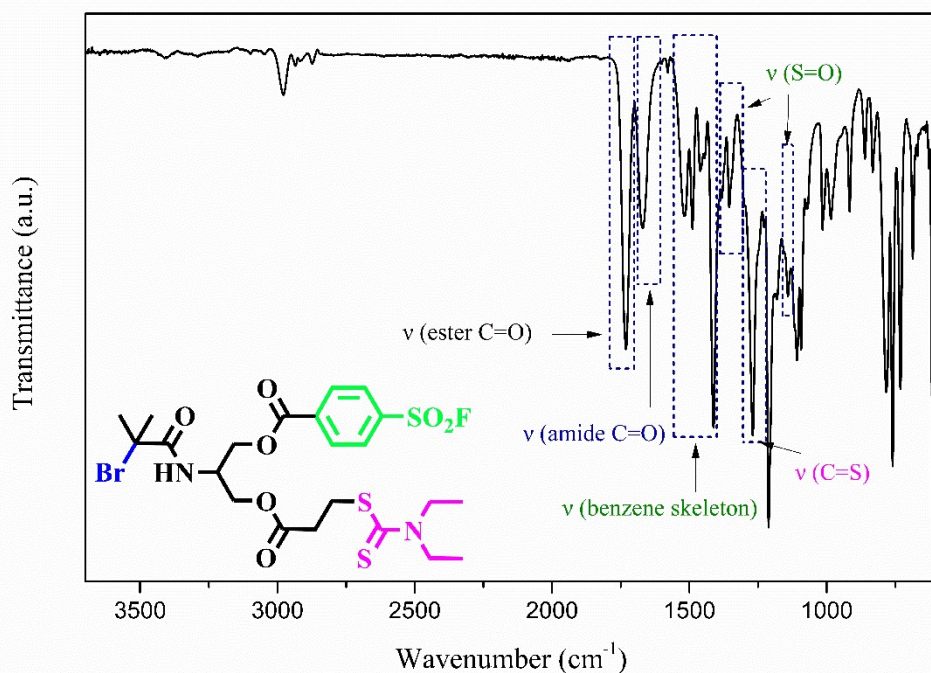

**Figure S3.** FT-IR spectrum of Y-iniferter.

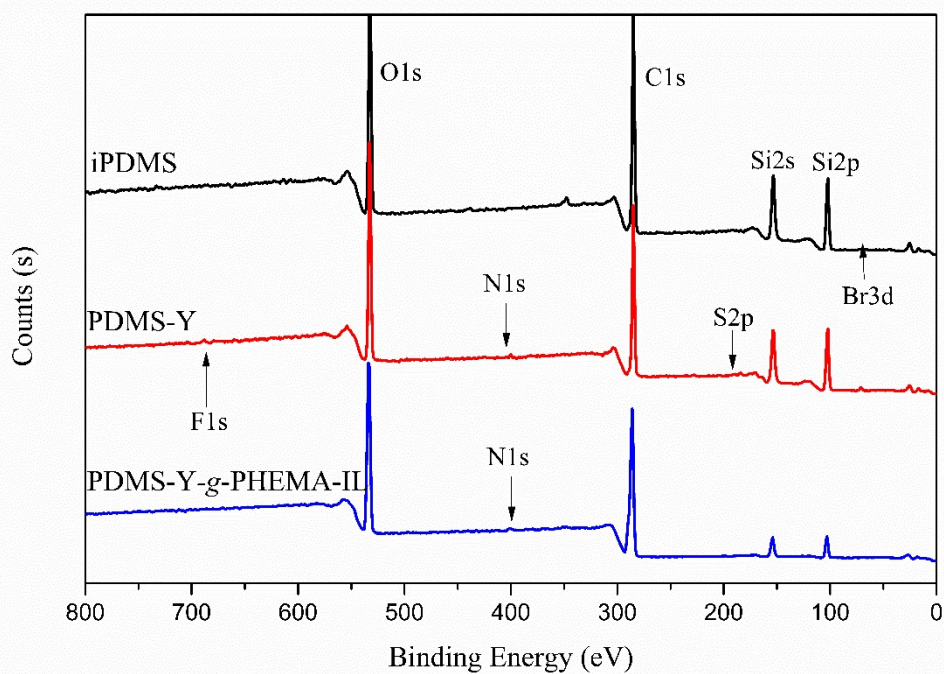

**Figure S4.** XPS survey spectra of iPDMS, PDMS-Y, and PDMS-Y-g-PHEMA-IL surfaces.



a)

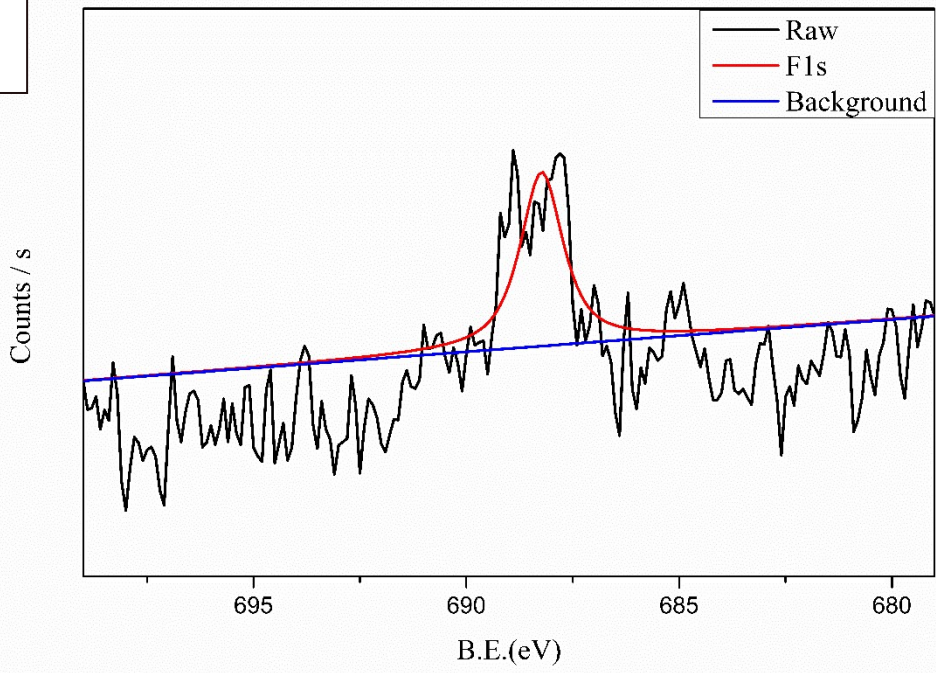

b)

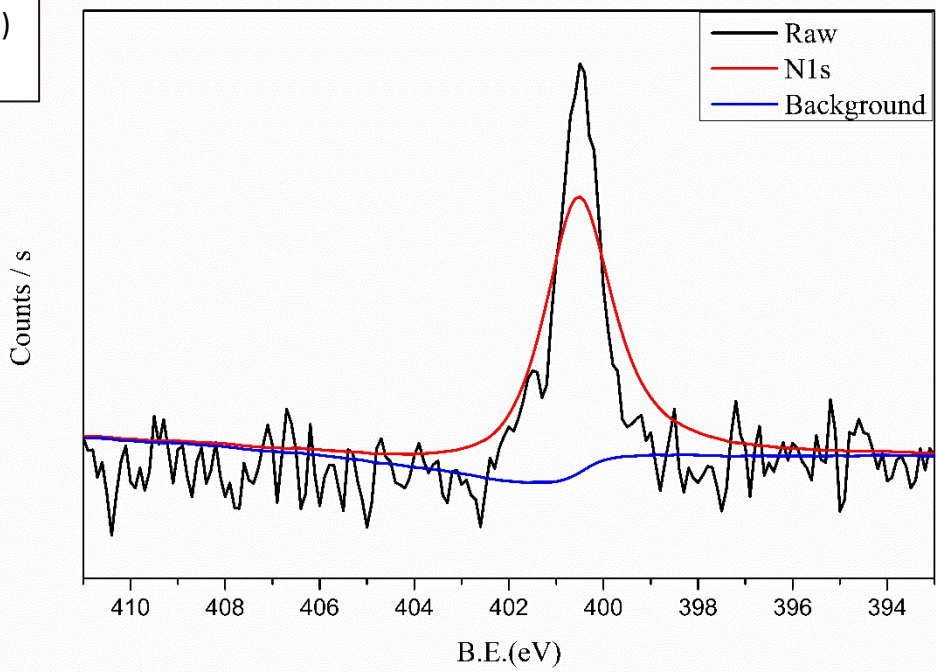

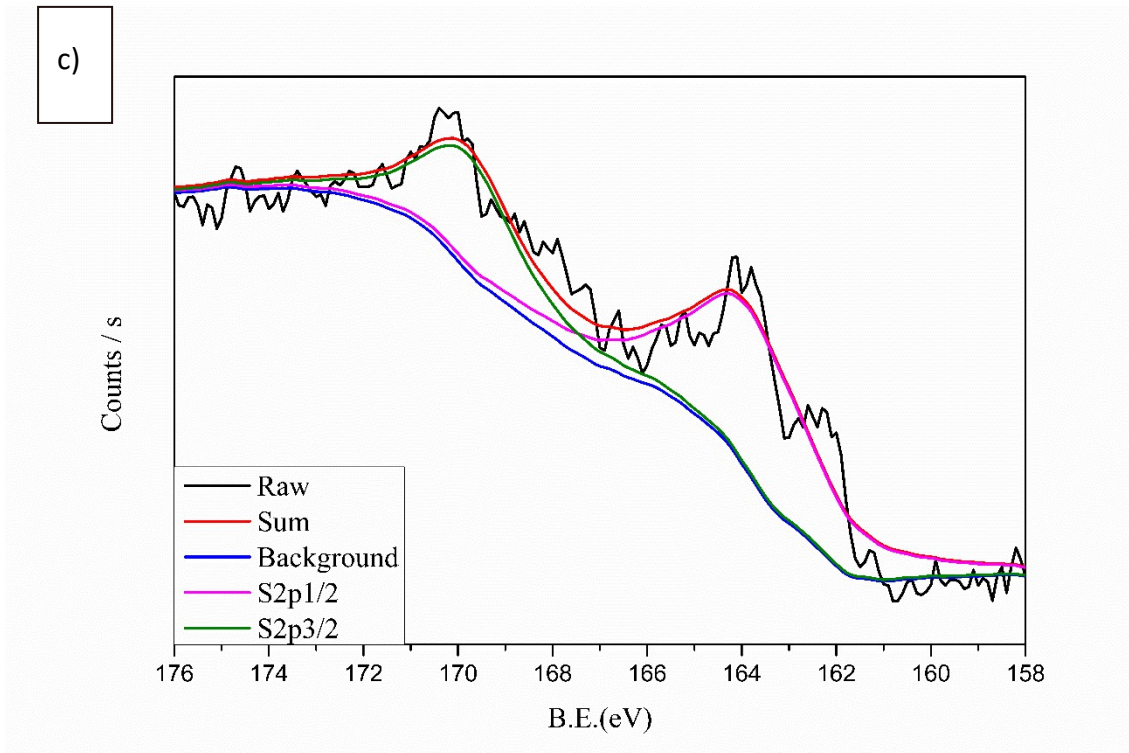

**Figure S5.** XPS high-resolution spectra of a) F (1s 688.23eV); b) N (1s 400.56eV); c) S (2p1/2 163.79eV, 2p3/2 169.79eV) on PDMS-Y surface.

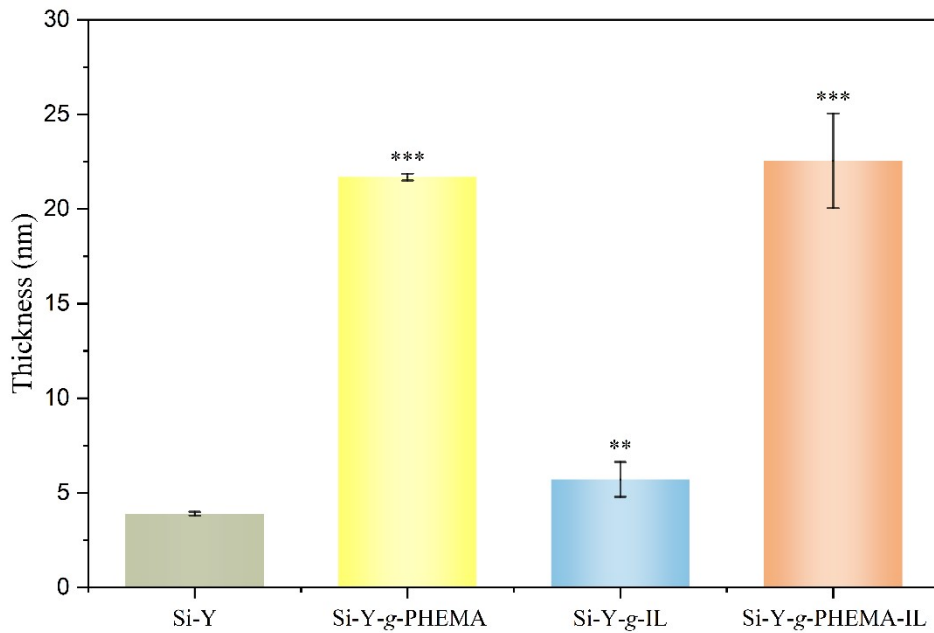

**Figure S6.** Ellipsometry thickness of the grafted layer on the modified Si wafers. The

data are presented as mean  $\pm$  standard deviation ( $n = 3$ ). \*, \*\*, and \*\*\* respectively indicate  $p > 0.05$ ,  $0.01 < p < 0.05$ , and  $p < 0.01$  (calculated by student's t-test), where the asterisks on the error bars represent the comparison of the samples with the control group (Si-Y).

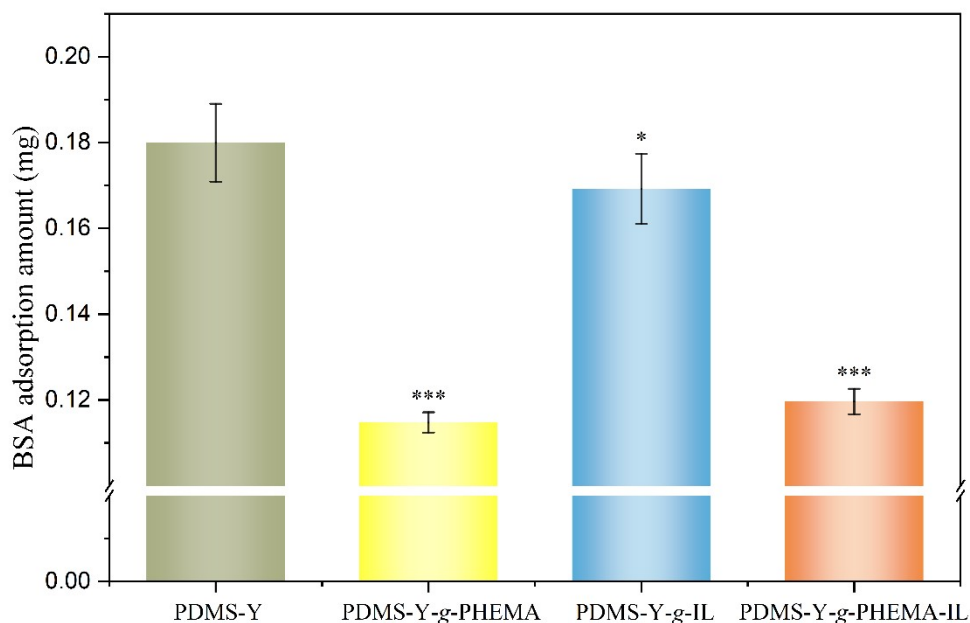

**Figure S7.** The amount of Bovine Serum Albumin (BSA) adsorbed on each slice of PDMS-Y, PDMS-Y-g-PHEMA, PDMS-Y-g-IL, and PDMS-Y-g-PHEMA-IL surface. The data are presented as mean  $\pm$  standard deviation ( $n = 3$ ). \*, \*\*, and \*\*\* respectively indicate  $p > 0.05$ ,  $0.01 < p < 0.05$ , and  $p < 0.01$  (calculated by student's t-test), where the asterisks on the error bars represent the comparison of the samples with the control group (PDMS-Y).

**Table S1.** Element mapping on the surface of various samples as measured by SEM-EDS. The figures are all at a scale of 25 microns.

| Samples         | iPDMS | PDMS-Y | PDMS-Y-g-PHEMA-IL |
|-----------------|-------|--------|-------------------|
| Element mapping |       |        |                   |



|    |                                                                                    |                                                                                      |                                                                                       |
|----|------------------------------------------------------------------------------------|--------------------------------------------------------------------------------------|---------------------------------------------------------------------------------------|
| C  | 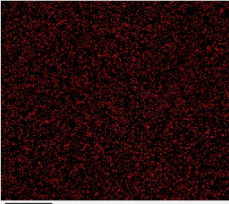  |    |    |
| O  |   |    |    |
| Si |   |    |    |
| Br |  |   |   |
| F  | -                                                                                  |  |  |
| N  | -                                                                                  |  |  |
| S  | -                                                                                  |  |  |



**Table S2.** The weight percentage of elemental content on each sample surface as measured by EDS.

| Samples                        | Wt% of element |       |       |      |      |      |      |
|--------------------------------|----------------|-------|-------|------|------|------|------|
|                                | C              | O     | Si    | Br   | F    | N    | S    |
| iPDMS                          | 38.95          | 41.30 | 19.30 | 0.44 | -    | -    | -    |
| PDMS-Y                         | 38.92          | 33.03 | 27.06 | 0.27 | 0.13 | 0.46 | 0.13 |
| PDMS-Y- <i>g</i> -<br>PHEMA-IL | 49.81          | 26.35 | 22.95 | 0.33 | 0.14 | 0.40 | 0.03 |

**Table S3.** Calculated positive charge density of various samples. Data were shown as the mean  $\pm$  standard deviation ( $n=3$ ). \*, \*\*, and \*\*\* respectively indicate  $p > 0.05$ ,  $0.01 < p < 0.05$ , and  $p < 0.01$  (calculated by student's t-test) compared with the control group (PDMS-Y).

| Samples                        | Surface Positive Charge Density ( $N^+ \times 10^{14}/cm^2$ ) | p   |
|--------------------------------|---------------------------------------------------------------|-----|
| PDMS-Y                         | $0 \pm 0.035$                                                 | -   |
| PDMS-Y- <i>g</i> -PHEMA        | $0.229 \pm 0.021$                                             | **  |
| PDMS-Y- <i>g</i> -IL           | $27.987 \pm 2.236$                                            | *** |
| PDMS-Y- <i>g</i> -<br>PHEMA-IL | $22.834 \pm 2.305$                                            | *** |
